# Supplementary material for: Ongoing grounding line retreat and fracturation initiated at the Petermann Glacier ice shelf, Greenland after 2016
Source: Copernicus journal article supplement (doi:10.5194/tc-2022-16), 2022-02-17
Supplement: Supplementary file 1 [file tc-2022-16-supplement-version1.zip]

## Sheet: Sheet1
	Date1	Date2	Date3	Date4	Orbit1	Orbit2	Orbit3	Orbit4
ERS-1	920126	920129	920129	920201	2775	2818	2818	2861
ERS-1	920320	920323	920323	920326	3549	3592	3592	3635
ERS-1	920317	920320	920320	920323	3506	3549	3549	3592
ERS-1	920213	920216	920216	920219	3033	3076	3076	3119
ERS-1	920210	920213	920213	920216	2990	3033	3033	3076
ERS-1	920204	920207	920207	920210	2904	2947	2947	2990
ERS-1	920201	920204	920204	920207	2861	2904	2904	2947
ERS-1	920129	920201	920201	920204	2818	2861	2861	2904
ERS-1/2	951025	951026	960207	960208	22373	2700	23876	4203
ERS-2	110425	110428	110428	110501	83720	83763	83763	83806
Sentinel-1A/B	150523	150204	150204	150216	4298	4473	4473	4648
Sentinel-1A/B	150827	150908	150908	150920	7448	7623	7623	7798
Sentinel-1A/B	150920	151002	151014	151026	7798	7973	8148	8323
Sentinel-1A/B	151002	151014	151014	151026	7973	8148	8148	8323
Sentinel-1A/B	151002	151014	151026	151107	7973	8148	8323	8498
Sentinel-1A/B	151026	151107	151107	151119	8323	8498	8498	8673
Sentinel-1A/B	151026	151107	151119	151201	8323	8498	8673	8848
Sentinel-1A/B	151107	151119	151119	151201	8498	8673	8673	8848
Sentinel-1A/B	151107	151119	151201	151213	8498	8673	8848	9023
Sentinel-1A/B	151119	151201	151213	151225	8673	8848	9023	9198
Sentinel-1A/B	151201	151213	151213	151225	8848	9023	9023	9198
Sentinel-1A/B	151201	151213	151225	160106	8848	9023	9198	9373
Sentinel-1A/B	151213	151225	151225	160106	9023	9198	9198	9373
Sentinel-1A/B	151205	151217	151229	160110	8912	9087	9262	9437
Sentinel-1A/B	151217	151229	151229	160110	9087	9262	9262	9437
Sentinel-1A/B	161223	161229	161229	170104	14512	3616	3616	14687
Sentinel-1A/B	161217	161223	161229	170104	3441	14512	3616	14687
Sentinel-1A/B	161020	161026	161026	161101	13573	2677	2677	13748
Sentinel-1A/B	161026	161101	161101	161107	2677	13748	13748	2852
Sentinel-1A/B	161101	161107	161107	161113	13748	2852	2852	13923
Sentinel-1A/B	161107	161113	161119	161125	2852	13923	3027	14098
Sentinel-1A/B	161119	161125	161125	161201	3027	14098	14098	3202
Sentinel-1A/B	161119	161125	161201	161207	3027	14098	3202	14273
Sentinel-1A/B	161225	161231	161231	170106	3552	14623	14623	3727
Sentinel-1A/B	161024	161030	161105	161111	13637	2741	13812	2916
Sentinel-1A/B	161030	161105	161111	161117	2741	13812	2916	13987
Sentinel-1A/B	161111	161117	161117	161123	2916	13987	13987	3091
Sentinel-1A/B	161117	161123	161129	161205	13987	3091	14162	3266
Sentinel-1A/B	161123	161129	161129	161205	3091	14162	14162	3266
Sentinel-1A/B	161211	161217	161217	161223	14337	3441	3441	14512
Sentinel-1A/B	161119	161125	161125	161201	3027	14098	14098	3202
Sentinel-1A/B	161125	161201	161207	161213	14098	3202	14273	3377
Sentinel-1A/B	161213	161219	161225	161231	3377	14448	3552	14623
Sentinel-1A/B	161219	161225	161225	161231	14448	3552	3552	14623
Sentinel-1A/B	161225	161231	161231	170106	3552	14623	14623	3727
Sentinel-1A/B	161024	161030	161030	161105	13637	2741	2741	13812
Sentinel-1A/B	161111	161117	161117	161123	2916	13987	13987	3091
Sentinel-1A/B	161211	161217	161217	161223	14337	3441	3441	14512
Sentinel-1A/B	161217	161223	161229	170104	3441	14512	3616	14687
Sentinel-1A/B	170921	170927	170927	171003	18473	7577	7577	18648
Sentinel-1A/B	170510	170516	170516	170522	5541	16612	16612	5716
Sentinel-1A/B	170915	170921	170927	171003	7402	18473	7577	18646
Sentinel-1A/B	170826	170901	170907	170913	7116	18187	7291	18362
Sentinel-1A/B	170428	170504	170504	170510	5366	16437	16437	5541
Sentinel-1A/B	170901	170907	170907	170913	18187	7291	7291	18362
Sentinel-1A/B	171021	171027	171027	171102	7927	18998	18998	8102
Sentinel-1A/B	170311	170317	170323	170329	4666	15737	4841	15912
Sentinel-1A/B	170203	170209	170209	170215	4141	15212	15212	4316
Sentinel-1A/B	170404	170410	170410	170416	5016	16087	16087	5191
Sentinel-1A/B	161229	170104	170104	170110	3616	14687	14687	3791
Sentinel-1A/B	170512	170518	170518	170524	16548	5652	5652	16723
Sentinel-1A/B	171129	171126	171126	171202	19348	8452	8452	19523
Sentinel-1A/B	170311	170317	170317	170323	4666	15737	15737	4841
Sentinel-1A/B	170428	170504	170510	170516	5366	16437	5541	16612
Sentinel-1A/B	161231	170106	170106	170112	14623	3727	3727	14798
Sentinel-1A/B	170106	170112	170112	170118	3727	14798	14798	3902
Sentinel-1A/B	170416	170422	170428	170504	5191	16262	5366	16437
Sentinel-1A/B	170822	170828	170903	170909	7052	18123	7227	18298
Sentinel-1A/B	170410	1704166	170416	170422	16087	5191	5191	16262
Sentinel-1A/B	171003	171009	171009	171015	18648	7752	7752	18823
Sentinel-1A/B	180523	180529	180529	180604	22037	11141	11141	22212
Sentinel-1A/B	180517	180523	180523	180529	10966	22037	22037	11141
Sentinel-1A/B	180423	180429	180429	180505	10616	21687	21687	10791
Sentinel-1A/B	180417	180423	180423	180429	21512	10616	10616	21687
Sentinel-1A/B	180330	180405	180405	180411	10266	21337	21337	10441
Sentinel-1A/B	180318	180324	180324	180330	10091	21162	21162	10266
Sentinel-1A/B	180306	180312	180312	180318	9916	20987	20987	10091
Sentinel-1A/B	180228	180306	180306	180312	20812	9916	9916	20987
Sentinel-1A/B	180222	180228	180228	180306	9741	20812	20812	9916
Sentinel-1A/B	180210	180216	180218	180222	9566	20637	20637	9741
Sentinel-1A/B	171230	180105	180105	180111	19937	9041	99041	20112
Sentinel-1A/B	180525	180531	180531	180606	11077	22148	22148	11252
Sentinel-1A/B	180519	180525	180525	180531	21973	11077	11077	22148
Sentinel-1A/B	180425	180501	180501	180507	21623	10727	10727	21798
Sentinel-1A/B	180419	180425	180425	180501	10552	21623	21623	10727
Sentinel-1A/B	180413	180419	180419	180425	21448	10552	10552	21623
Sentinel-1A/B	180326	180401	180401	180407	10202	21273	21273	10377
Sentinel-1A/B	180320	180326	180326	180401	21098	10202	10202	21273
Sentinel-1A/B	180212	180218	180218	180224	20573	9677	9677	20748
Sentinel-1A/B	190106	190112	190112	190118	25362	14466	14466	25537
Sentinel-1A/B	191021	191027	191027	191102	29562	18666	18666	29737
Sentinel-1A/B	190414	190420	190420	190426	15802	26873	26873	15977
Sentinel-1A/B	190126	190201	190201	190207	25648	14752	14752	25823
Sentinel-1A/B	190408	190414	190414	190420	26698	15802	15802	26873
Sentinel-1A/B	190106	190112	190112	190118	25362	14466	14466	25537
Sentinel-1A/B	191021	191027	191027	191102	29562	18666	18666	29737
Sentinel-1A/B	190207	190213	190213	190219	25823	14927	14927	25998
Sentinel-1A/B	190217	190223	190223	190301	14991	26062	26062	15166
Sentinel-1A/B	190307	190313	190313	190319	26237	15341	15341	26412
Sentinel-1A/B	191102	191108	191108	191114	29737	18841	18841	29912
Sentinel-1A/B	190424	190430	190430	190506	26937	16041	16041	27112
Sentinel-1A/B	201102	201108	201108	201114	24091	35162	35162	24266
Sentinel-1A/B	201110	201116	201116	201122	24202	35273	35273	24377
Sentinel-1A/B	200226	200303	200303	200309	31423	20527	20527	31598
Sentinel-1A/B	200222	200228	200228	200305	31370	20474	20474	31545
Sentinel-1A/B	201114	201120	201120	201126	24266	35337	35337	24441
Sentinel-1A/B	200327	200402	200402	200408	20877	31948	31948	21052
Sentinel-1A/B	200408	200414	200414	200420	21052	32123	32123	21227
Sentinel-1A/B	200903	200909	200909	200915	23216	34287	34287	23391
Sentinel-1A/B	200424	200430	200430	200506	21291	32632	32632	21466
Sentinel-1A/B	201208	201214	201214	201220	24616	35687	35687	24791
Sentinel-1A/B	201208	201214	201214	201220	24616	35687	35687	24791
Sentinel-1A/B	201210	201216	201216	201222	35623	24727	24727	35798
Sentinel-1A/B	200406	200412	200412	200418	32012	2116	2116	32187
Sentinel-1A/B	200905	200911	200911	200917	34223	23327	23327	34398
Sentinel-1A/B	201009	201015	201015	201021	23741	34812	34812	23916
Sentinel-1A/B	201009	201015	201015	201021	23741	34812	34812	23916
Sentinel-1A/B	200909	200915	200915	200921	34287	23391	23391	34462
Sentinel-1A/B	200909	200915	200915	200921	34287	23391	23391	34462
Sentinel-1A/B	201202	201208	201208	201214	35512	24616	24616	35687
Sentinel-1A/B	210419	210425	210425	210501	26541	37612	37612	26716
Sentinel-1A/B	210314	210320	210320	210326	26016	37087	37087	26191
Sentinel-1A/B	210109	210115	210115	210121	25077	36148	36148	25252
Sentinel-1A/B	210210	210216	210216	210222	25549	36620	36620	25724
Sentinel-1A/B	210208	210214	210214	210220	36498	25602	25602	36673
Sentinel-1A/B	210222	210228	210228	210306	25724	36795	36795	25899
Sentinel-1A/B	210216	210222	210222	210228	36620	25724	25724	36795
Sentinel-1A/B	210107	210113	210113	210119	36037	25141	25141	36212
Sentinel-1A/B	210113	210119	210119	210125	25141	36212	36212	25316
Sentinel-1A/B	210125	210131	210131	210206	25316	36387	36387	25491
Sentinel-1A/B	210206	210212	210212	210218	25491	36562	36562	25666
Sentinel-1A/B	210212	210218	210218	210224	36562	25666	25666	36737
Sentinel-1A/B	210218	210224	210224	210302	25666	36737	36737	25841
Sentinel-1A/B	210224	210302	210302	210308	36737	25841	25841	36912
Sentinel-1A/B	210224	210302	210302	210308	36737	25841	25841	36912
Sentinel-1A/B	210314	210320	210320	210326	26016	37087	37087	26191
Sentinel-1A/B	210326	210401	210401	210407	26191	37262	37262	26366
Sentinel-1A/B	210326	210401	210401	210407	26191	37262	37262	26366
Sentinel-1A/B	210401	210407	210407	210413	37262	26366	26366	37437
Sentinel-1A/B	210425	210501	210501	210507	37612	26716	26716	37787
Sentinel-1A/B	210204	210210	210210	210216	36445	25549	25549	36620
Sentinel-1A/B	210204	210210	210210	210216	36445	25549	25549	36620
Sentinel-1A/B	210210	210216	210216	210222	25549	36620	36620	25724
Sentinel-1A/B	210216	210222	210222	210228	36620	25724	25724	36795
COSMO-Skymed	200906	200907	201109	201110
COSMO-Skymed	200501	200502	200517	200518
COSMO-Skymed	200213	210214	210317	210318
COSMO-Skymed	200906	200907	201024	201025
COSMO-Skymed	210112	210113	210213	210214
COSMO-Skymed	210402	210403	210520	210521
COSMO-Skymed	210402	210403	210418	210419
COSMO-Skymed	200501	200502	200602	200603
COSMO-Skymed	210317	210318	210504	210505
COSMO-Skymed	201109	201110	210112	210113
COSMO-Skymed	201211	201212	210213	210214
COSMO-Skymed	210317	210318	210402	210403
COSMO-Skymed	210317	210318	210418	210419
COSMO-Skymed	210418	210419	210504	210505
COSMO-Skymed	210317	210318	210520	210521
COSMO-Skymed	210213	210214	210418	210419
COSMO-Skymed	201211	201212	210112	210113
