# Supplementary material for: Ongoing grounding line retreat and fracturation initiated at the Petermann Glacier ice shelf, Greenland after 2016
Source: Copernicus journal article supplement (doi:10.5194/tc-2022-16), 2022-02-17
Supplement: Supplementary file [file tc-2022-16-AC1-supplement.zip]

# Ongoing grounding line retreat and fracturation initiated at the Petermann Glacier ice shelf, Greenland after 2016

Romain Millan<sup>1,2</sup>, Jeremie Mouginot<sup>2,3</sup>, Anna Derkacheva<sup>1</sup>, Eric Rignot<sup>3,4</sup>, Pietro Milillo<sup>5</sup>, Enrico Ciraci<sup>4</sup>,  
5 Luigi Dini<sup>6</sup>, Anders Bjørk<sup>2</sup>

<sup>1</sup>Université Grenoble Alpes, CNRS, IRD, INP, 38400, Grenoble, Isère, France

<sup>2</sup>Department of Geosciences and Natural Resources Management, University of Copenhagen, 1350, Copenhagen, Denmark

<sup>3</sup>Department of Earth System Science, University of California, Irvine, 92697, CA, USA

<sup>4</sup>Jet Propulsion Laboratory, Caltech, Pasadena, CA, USA

10 <sup>5</sup>Department of Civil and Environmental Engineering, University of Houston, TX, USA

<sup>6</sup>Italian Space Agency, Matera, Italy

*Correspondence to:* Romain Millan (romain.millan@univ-grenoble-alpes.fr)

15 **Abstract.** The Petermann ice shelf is one of the largest in Greenland, buttressing 4% of the total ice sheet discharge, and is considered dynamically stable. In this study, we use differential synthetic aperture radar interferometry to reconstruct the grounding line migration between 1992 and 2021. Over the last thirty years, we find that the grounding line of Petermann retreated 4 km, 7.5 km and 4.5 km in the western, central and eastern sectors, respectively. ~~However, it is only since~~The majority of the retreat in the central sector took place between 2017  
20 ~~that and 2021, where~~ the glacier ~~has undergone a significant retreat in its central section, receding~~receded more than 5 km along a retrograde bed grounded 500 m below sea level. ~~Simultaneously, two large fractures developed, splitting the ice shelf in three sections, with partially decoupled flow regime. The retreat followed the warming of the ocean waters by 0.4°C in Nares Strait. As a result, the glacier sped up by 15% in 2016–2018.~~ While the central sector stabilized on a sill, the eastern flank is sitting on top of a down-sloping bed, which might enhance the  
25 glacier retreat in the coming years. This grounding line retreat follow a speed up of the glacier by 15% in the period 2015–2018. Along with the glacier acceleration, two large fractures formed along flow in 2015, splitting the ice shelf in three sections, with partially decoupled flow regime. While these of events followed the warming of the ocean waters by 0.4°C in Nares Strait, the use of a simple grounding line model suggests that enhanced submarine melting may have been responsible for the recent grounding line migration of Petermann Glacier.

30

## 1 Introduction

The Greenland Ice Sheet (GrIS) is a main contributor to sea level rise at present (Reager et al. 2016, Mouginit et al., 2019, Shepherd et al. 2020), and its contribution is expected to increase in the coming years (e.g., Choi et al., 2021). While the vast majority of Greenland marine terminating glaciers do not end in extensive floating extensions, ~18% of Greenland's total ice volume is buttressed by ice shelves in the North (Mouginit et al., 2019, Morlighem et al., 2017). It is of prime importance to document the evolution of these ice shelves as their weakening may destabilize this sector and significantly increase the contribution of GrIS to sea level rise (Mouginit et al., 2014). Indeed, enhanced submarine melting (Wilson et al., 2017) and deep rheological damaging (Lhermitte et al., 2019), have the potential to reduce the buttressing effect of glaciers, triggering increased rates of mass losses through dynamic ice discharge.

Petermann glacier is located on the northwestern part of the GrIS and ends in the second largest floating extension after Nioghalvfjerdjorden glacier, with a length of 70 km in the 1990's and a width of 20 km. ~~In the last 20 years~~Since 1995, this glacier ~~hasseems to have~~ increased its ice discharge from  $10.56 \pm 1$  Gt/yr up to  $11.57 \pm 1.2$  Gt/yr ~~in 2018~~ (Mouginit et al., 2019). Recent studies using Worldview Digital Elevation Models (DEMs) revealed submarine melt rates near the glacier grounding line that exceed 50 m/yr (Wilson et al., 2017). The grounding line is one of the most sensitive ~~region~~regions of a glacier as its migration significantly modulates resistance to flow (Fürst et al., 2016; Reese et al., 2018; Thomas 1979). Satellite radar interferometry data from the Earth Remote Sensing Satellite-1 were used to map the grounding line of Petermann Glacier in the 1990s and detect its migration between 1992 and 2011 (Rignot et al., 1996; Hogg et al., 2016). From these observations, it was concluded that the long-term changes in grounding line locations on Petermann Glacier were ~~not detectable because of indistinguishable from~~ tidal ~~modulations of the position and~~fluctuations, despite the reported ~~thinning if the~~ ice shelf ~~thinning~~ (Wilson et al., 2017; Rückamp et al., 2019; Münchow et al., 2014). Petermann Glacier also ~~lost~~ about half of its floating extension via two large calving events in 2010 and 2012. The glacier showed a limited velocity response to these calving events (Hill et al., 2018; Rückamp et al., 2019), suggesting that the glacier was still dynamically stable. ~~Hill et al., (2018) suggested however that if future calving occurs within 12 km of the grounding line, the changes in~~ the ice-shelf buttressing would be sufficient for the glacier to accelerate substantially.

~~Since 2014, the launches~~Since 2011, no extensive grounding line mapping of Petermann Glacier have been conducted (Hogg et al., 2016). ~~Nevertheless, with the launches in 2014 and 2016~~ of a constellation of two Sentinel-1 (S1) C-band synthetic aperture radar satellites by ESA for the European Copernicus initiative ~~have increased,~~ the ~~perspectives~~opportunity to ~~study~~ glacier ~~document the~~ dynamics and ~~the~~ grounding line ~~migration~~position of Peterman exists (Milillo et al., 2019; Mohajerani et al., 2021). Following recommendations by the Polar Space Task Group under the umbrella of the World Meteorological Organization, Sentinel-1 has continuously acquired since June 2015 a set of six tracks that cover the entire coast of Greenland, hence providing a systematic and comprehensive coverage at a revisit time of 6 days. This continuous observation record has

made it possible to map the grounding lines of ice shelves in a more comprehensive and systematic way. Indeed, Sentinel-1  
65 allows not only to map the grounding line again since ERS-1, but on multiple occasions, several times a year, hence providing  
information about the zone of short-term migration or grounding zone (Mohajerani et al., 2021). ~~Following a first set of data  
in 2013) and its long-term evolution. In addition to Sentinel-1a/b,~~ the Agenzia Spaziale Italiana's Cosmo-SkyMed®  
constellation (X-band synthetic aperture radar satellites) has acquired 1-day repeat pass data over Petermann Glacier in 2013  
and 2020, hence providing additional complementary and high resolution coverage of ~~its~~ Petermann's grounding line  
70 ~~migration in addition to Sentinel 1a/b.~~

Here, we present the grounding line history of Petermann ~~glacier~~ Glacier, spanning between 1992 and 2021, or 30 years. We  
combine satellite radar interferometry and optical imagery to track both the grounding line and the change in ice velocity of  
the glacier. We examine concurrent changes in the ocean waters surrounding the glacier. We conclude on the evolution of the  
75 glacier grounding line and its consequences for the future years.

## 2 Data and methods

### 2.1 Interferometry Grounding line positions

We use Interferometric Synthetic Aperture Radar (InSAR) data from the ESA's Earth Remote Sensing radar satellite (ERS-1)  
acquired in 1992 and 2011 with a 3-day revisit time, in 1995/1996 from the ERS-1 and ERS-2 tandem mission, and in 2011  
80 from a 3-day revisit time ERS-2 mission end. Data are downloaded via the ESA Online Dissemination Service as single look  
complex scenes and processed using the GAMMA Software (Werner et al., 2000). We measure the tide-induced vertical  
motion of ice using a Quadruple Differential SAR Interferometry approach (QDInSAR) (Rignot et al., 2011). In order to  
maintain good phase coherence in fast flowing regions, we first coregister single look complex (SLC) data by estimating the  
pixel offset using classical speckle tracking technique (Michel and Rignot., 1999; Scheuchl et al., 2016). Interferograms are  
85 then assembled by calculating the phase difference between the two co-registered SLCs. To obtain the grounding line position,  
we combine two interferograms spanning the same time interval, correct for topography, and differentiate them (Rignot et al.,  
2011). We use the GIMP v1 DEM time-tagged in 2007 to remove the topographic signal.

For the time period 2014 to 2021, we use observations collected by Sentinel-1 with a repeat cycle of 6 to 12 days in  
90 Interferometric Wide Swath (IW) mode, a Terrain Observation with Progressive Scans SAR (TOPS) mode. In order to avoid  
phase jumps at burst boundaries, interferograms from this sensor are processed using a precise TOPS coregistration methods,  
which also registers the Doppler history of the slave data (Scheuchl et al., 2016). We use the GIMP DEM v2 time-tagged in  
2014 to correct for the topographic phase for S1 (Howat et al., 2017). For both ERS-1 and S1, the differential interferograms  
are formed after geocoding the interferograms in geographic coordinates (North Polar Stereographic projection) at 25 meters

95 posting. As in Rignot et al. (2014), we map the inward limit of detection of vertical motion, where the glacier first lifts off its bed.

100 ~~COSMO-SkyMed® (CSK)~~To complete the S1 data in 2020 and 2021, we use high-resolution observation of the grounding line from COSMO-SkyMed® (CSK). CSK grounding line measurements use two satellites (CSK2 and CKS4) each with a 16-day repeat cycle. The temporal baseline between CSK2 and CSK4 is one day. In order to avoid changes in the horizontal velocity of the glacier we combine a double-difference interferogram using two one-day interferograms acquired 16 days apart. CSK acquires in STRIPMAP mode three consecutive frames to cover the entire glacier and its ice shelf. We stitch all the frames in order to combine a single single-look-complex (SLC) covering a 40x120 km swath. Following the approach described in Milillo et al., (2017) and Brancato et al., (2020), we apply 8 looks in both range and azimuth to improve InSAR phase coherence. The final geocoded product has a resolution of  $25 \times 25$  m. As for the Sentinel-1 case, we use the GIMP ~~v1~~v2 DEM ~~time tagged in 2007~~ to remove the topographic signal. Finally, the grounding line is characterized using the same QDInSAR with the approach, by differencing two interferograms ~~assembled over the four epochs~~, in the vicinity of the flexure zone, as for ERS-1/2 and Sentinel-1 data (see above). ~~CSK completes the S1 observations in 2020 and 2021, by providing some high-resolution observations~~We document in Supplementary Table 1 the complete list of interferograms used to map the grounding line.

## 2.2 Ice velocity

In addition to the migration of the grounding line, we monitor the evolution of glacier velocity by calculating the surface displacement from 3 different satellite sensors from images collected between 2013 and 2021. Two of them, ESA's Sentinel-2 (S2) and NASA's Landsat-8 (L8), are optical imagers and one, ESA's Sentinel-1 (S1), is a synthetic aperture radar operating in C-band. We use persistent surface features or speckle to map ice displacements between two consecutive images. We calculate the normalized cross-correlations between the reference and slave image chips using repeat cycles shorter than 30 days for Landsat-7/8 and Sentinel-2, and 12 days for Sentinel-1 (Mouginot et al., 2017; Millan et al., 2019; 2022). Between 1999 and 2012 we ~~supplemented~~supplement our Landsat-7 ice velocity record with repeat cycles ranging from 336 to 400 days. For L8, S2, and S1, sub-images of  $32 \times 32$ ,  $32 \times 32$ , and  $192 \times 48$  pixels are used, respectively. We ~~calibrated~~calibrate our displacement maps by taking advantage of the ice velocity products from prior surveys in Mouginot et al. (2017). The final calibrated maps are resampled to 150 m posting in the north polar stereographic projection (EPSG:3413). The time series established is completed by historical measurements made from ERS-~~1/2~~-1/2, RADARSAT-1, ALOS/PALSAR, ENVISAT/ASAR, Landsat 4 to 7 and TerraSAR-X (Mouginot et al. 2019, Derkacheva et al., 2020; Joughin ~~and~~et al., 2017; Howat et al., 2020). The satellite-derived measurements between 2015 and 2021 are post-processed with locally weighted polynomial regression (Derkacheva et al., 2019) to improve signal to noise ratio and data redundancy. Relative changes in velocity are measured from the 2014-2015 winter mean velocity (January to March).



In order to monitor ~~the propagations of rifts and fractures~~changes in rates of ice deformation, we derive the evolution of the shear strain rate for 2000 and 2019 using annual ice velocity mosaics (Mouginot et al. ~~2019~~2019). The choice of these two periods is made according to the quality of the surface flow velocity product, and to cover time periods preceding and following large events of grounding line migrations (see section 3.1). Strain rates were retrieved using the same methodology as described in Alley et al., 2018, where the shear strain rate is defined as:

$$\dot{\epsilon}_{shear} = (\dot{\epsilon}_y - \dot{\epsilon}_x) \cos \alpha \sin \alpha + \dot{\epsilon}_{xy}(\cos^2 \alpha - \sin^2 \alpha)$$

where  $\dot{\epsilon}_x$ ,  $\dot{\epsilon}_y$  and  $\dot{\epsilon}_{xy}$  are the component of the strain rate tensor, calculated from the two components of the ice velocity field (Nye, 1959), and  $\alpha$  is the flow angle, defined counter-clockwise from the x-axis (positive in the x direction) (Alley et al., 2016).

### 3 Results

#### 3.1 Grounding line evolution

~~Overall, we~~We formed more than 800 quadruple difference interferograms, with 90% from S1 while the rest was acquired from ERS and CSK, which allows grounding line monitoring at a high temporal frequency. ~~In the~~Overall, we manually digitized 163 of the total number of interferograms (see Supplementary Table 1). In summer, decorrelation due to surface melting prevents us from mapping the grounding line on most interferograms. Differential interferograms and grounding lines are shown in Figure 2 for 1992, 1996, 2011, 2015, 2016 and every year from 2018 to 2021. For every single year, we display all the grounding line locations, which allows us to document its interannual spatial variability caused, for example, by oceanic tides.

The high number of ERS and Sentinel-1 double difference interferograms allows us to provide a rough quantification of the grounding zone width of the glacier, which averaged 550 m in 1992 and 630 m in 2015, before the glacier started to retreat substantially (Fig 3a). Considering an error in grounding line delineation of 110m (Mohajerani et al., 2021), these estimates are consistent with those of Hogg et al. (2016) with 470 m in 1992-2011. In 1992, the grounding line position of Petermann glacier ~~Glacier~~ was located 70 km from the ice front and remained relatively stable until 2011 ~~within uncertainties, which are about 1 km, meaning that it did not exceed variations induced by tidal modulations~~ (Fig 2, 3). Between 2011 and 2016, the western (T1) and eastern (T4) margins of the grounding line retreated by 3 km. During the same time period, we observe a retreat of 1.1 km and 2 km along transects T2 and T3, respectively (Fig 2 & 3). In 2015-2017, we were only able to map the central and eastern portion of the grounding line. ~~The high number of ERS and Sentinel-1 double difference interferograms allows us to provide a rough quantification of the grounding zone width of the glacier, which averaged 550 m in 1992 and 630~~

~~m in 2015, before the retreat (Fig 3a). These estimates are consistent with those of Hogg et al. (2016) with 470 m in 1992-2011.~~

Between 2017 and 2019, the grounding line position along the central transect T2 retreated by more than 4 km, while the rest of the grounding line remained relatively stable. Between 2019 and 2021, the retreat continued along T2 and the glacier retreated by another km (Fig 2 & 3), for a total retreat of 7 km compared to 1992. Within the same timeframe, the eastern (T4) and western (T1) sections of the grounding line retreated by 2 km, for a total retreat of 3.8 km and 4 km respectively, since 1992.

### 3.2 Ice shelf shear fracturation

In addition to the grounding line signature in the differential interferograms, we note the formation between 1992 and 1996 of a decorrelation structure in the eastern side of the shelf parallel to the flow direction (Fig 2a), which seems associated with the development of fracture zones. The fracture zones are manifest in the interferograms as regions of abrupt discontinuity in phase, indicating that the two sides of the fractures are not flexing exactly at the same pace, ~~which suggests a fracture across the entire thickness of the floating tongue, hence suggesting deep crevasses~~ rather than ~~just a surface crack/cracks~~. In 2011, another parallel fracture zone is visible in the western end of the ice shelf (Fig 2d-e). Between 2016 and present, these features became more pronounced and now extend on both sides of the portion of the grounding line that retreated (Fig 2e-i). The surface manifestation of these fracture is also visible using optical imagery from Landsat 7-8 (Fig 4c-d), with two distinct, and large crevasses developing on the shelf. Using insights from calculated strain rates, it is clearly visible that the development of these fractures corresponds to regions of particularly high shear (Fig 4a,b). Indeed, while the shear along the eastern fracture averaged  $-0.02 \text{ yr}^{-1}$  in 2000, it doubled to  $-0.04 \text{ yr}^{-1}$  in 2019. On the other hand, the fracture on the western side of the grounding line is a region of particularly high shear with a measured shear strain rate of up to  $-0.08 \text{ yr}^{-1}$  in 2019 (Fig 4b).

### 3.3 Time series of ice velocity

In Fig. 3b, we show the evolution of Petermann Glacier's velocity at a location 1 km upstream of its 2021 grounding line for the time period ~~1984-1992~~ to 2021. After 2014, we display in Fig. 3c the surface velocity across a 75 km long profile (~~A-A'-C-C'~~) that coincides with transect T2 (cf Fig 1). We find that, between ~~1984-1992~~ and 2021, the average speed has increased by 14%, or 150 m/yr (Fig. 3a). ~~The glacier motion was fairly stable until 2014. Before 2014, a pronounced, no multi-year change in ice velocity is observed, with winter speed staying near 1,050 m/yr. A significant~~ speedup started after the summer of 2015, with a winter speed ~~of that increased from 1,400-1,750~~ m/yr, and ended in 2018 at a winter speed of 1,200 m/yr. Superimposed on this interannual trend, the frequent velocity measurements available after 2013 reveal a strong summer acceleration of 10 to 15 % compared to the winter speed (Fig. 3b). The summer acceleration occurs uniformly along the ice shelf and propagates 40 km upstream of the grounding line (Fig. 3c). ~~The signal may even extend further inland, but it is not distinguishable from noise in our observations.~~ No delay between the acceleration at the grounding line and 40 km upstream is detectable on the

weekly time series. ~~The amplitude and duration of these summer speed-ups varies between years and is correlated with the intensity and duration of the melt season.~~

195 We also assembled a time series of surface flow velocity across three gates along the glacier width (Fig 1). The profile at the grounding displays a pronounced asymmetry in glacier flow, with an ice velocity of 1,000 m/yr ~~into~~ the west (km 0 to 10 ~~of~~ ~~Figure in Fig. 3c~~) ~~versus an~~ ice speed ~~of more than~~ 1,300 m/yr ~~in~~ on the ~~eastern~~ east side of the grounding line (>km 10 of Figure 3c). Along the ice shelf, the lateral difference in speed ~~diminishes~~ ~~decreases~~ rapidly ~~and gives way to an ice shelf~~ with ~~a surface velocity ranging between~~ ~~velocities varying from~~ 1,000 m/yr ~~close to~~ ~~near~~ the margins ~~and~~ ~~to more than~~ 1,300 m/yr in the central part. Interestingly, the velocity profiles across the ice shelf consistently show two steep transitions at km 5 and 200 km 12 of Fig 3d, where the ice velocity abruptly increases from 1,100 m/yr to more than 1,300 m/yr over a distance of ~~less~~ ~~than~~ 3 km. These ~~transitions~~ velocity discontinuities are detected more than 30 km downstream of the grounding line, ~~and~~ (Fig 4a, b) where the fracture zones with high shear are ~~more pronounced~~ ~~after~~ located as previously described. Figure 2e also shows ~~that these discontinuities evolve over time, with a velocity differential between at the fracture location of 100 m/yr before 2016~~ (Fig 4d) ~~to over 200 m/yr afterwards~~ (Fig. 3d).

### 205 3.4 Ocean thermal forcing

We reconstruct the history of ocean thermal forcing by compiling Conductivity Temperature Depth (CTD) measurements from the Hadley ~~center~~ centre (bodc.ac.uk) within Petermann fjord and Nares Straits, spanning from 1960 to 2019, combined with CTD from NASA's Ocean Melting Greenland Earth Venture Sub-orbital mission from 2016-2021 (Fenty et al., 2016). A warming signal was detected at depth from the 1970s to the 2000s ~~and an~~, with a warming of roughly 0.1°C. An even stronger 210 signal has taken place in the last decade (Fig 5) ~~), with a temperature that increased from 0.1°C in 2000 to 0.3°C in 2020.~~ Overall ocean temperature in the fjord at 350-450 m depth (the maximum grounding line depth is 500 m) is  $\geq 0.43^\circ\text{C}$  warmer in the ~~2000s~~ 2020 than in the 1970s-1980s. This warming signal has been documented elsewhere (Münchow et al., 2018) with a change in temperature of  $0.23^\circ\text{C}$  between 2003 and 2009 (Washam et al., 2018).

## 4 Discussion

215 Our results indicate that the surface velocity has remained relatively constant between 1986 and 2010 (Fig 4a). This result is consistent with the potential reduction in ice shelf buttressing only after 2012 caused by a large calving event (Rückamp et al., 2019). The significant glacier speed-up ~~that began in 2016 seems to precede the major episode of grounding line retreat in 2017~~ observed along transect T2 (Fig 3). After 2018, the surface velocity of Petermann remained stable, at 1200 m/yr (Fig 3b), ~~while the grounding line continued to retreat rapidly (Fig 3a).~~ This timing ~~after summer 2015~~ coincides with the ~~classical~~ sequences of events leading to the destabilization of ice shelves, with a reduction in buttressing due to enhanced basal melting by a warmer ocean triggers an increase in ice flow at the grounding line, which in turn leads to enhanced ice shelf thinning 220

that causes the grounding line to further retreat (Schoof, 2007; Rignot et al., 2014; Pattyn and Morlighem, 2020). Furthermore, development of the two along-flow shear fractures within the same time period (Fig 2e-i & Fig 3a). It is worth noting that the pronounced abrupt transitions in ice flow velocity (Fig. 3c-d) are spatially consistent with the development of these breakup zones along the ice shelf length (Fig 4), showing a partially-decoupled flow regime between, meaning that the three different parts of the ice shelf: flow at a slightly different pace. The rapid and more pronounced development of these fracture zones is consistent with large fractures along-shelf, may also be responsible for the timing of difference in flow regime between the floating and the grounded ice, where the grounding line retreat after 2016. While the ice flow of Petermann has abrupt transitions are not yet increased as much as other destabilised glaciers in Greenland such as Jakobshavn Isbræ (Motyka et al., present (Fig 3c & d), 2011) or Zachariae Isstrøm (Mouginot et al., 2015), these results may suggest that the Petermann may be entering a phase of destabilization and weakening of its ice shelf.

The warming ocean signal precedes the increase in speed and grounding line retreat (Fig. 3-5). A warmer ocean will erode the ice shelf faster because of the enhanced undercutting at the glacier grounding line (An et al., 2021). A calculation of the rate of undercutting based on the model of Rignot et al., (2016) for a grounding line depth of 500 m, neglecting the role of subglacial water fluxes, suggest that the rate of undercutting,  $q_m$ , should have increased by 15% as a result of the warming, which may not be sufficient to explain the retreat. Indeed, an increase in yearly undercutting from 140 m/yr to 180 m/yr only forces a retreat of the grounding line of 40 m/yr. Glacier thinning however also contributes to grounding line retreat since a thinner glacier reaches flotation sooner. With dynamic thinning at about 1 m/yr (Smith et al., 2019), The loss of ice shelf resistance to flow may have triggered an increase in ice flow velocity, causing further ice shelf thinning and consequently a grounding line retreat that happened later on between 2017 and 2018 (Gudmússon et al., 2012). After 2018, the surface velocity of Petermann remained stable, at 1200 m/yr (Fig 3b), while the grounding line continued to retreat rapidly on a retrograde bed slope (Fig 3a). This is consistent with the hypothesis that changes in ice dynamics may be the cause of the glaciers retreat, and that the recent retreat of the grounding line did not affect the flow of Petermann Glacier yet.

2020) on a 0.11% bed slope and a surface slope of 0.8% measured along the profile C-C', we calculate an expected retreat of about 130 m/yr (Rignot et al., 2016; Hogg et al., 2016). Combining the two effects, we are still below the retreat of 1.4 km/yr observed locally between 2017 and 2021 (Fig. 3a), hence the retreat at the glacier center may not be only conditioned by glacier dynamic thinning and enhanced undercutting by warmer ocean temperature. Indeed, other processes may have influenced the retreat of Petermann Glacier, such as the increase of subglacial water discharge (runoff) that would enhance basal melt at the grounding line (Jenkins et al., 2011), or the intrusion of pressurized seawater in newly formed cavities as proposed by Milillo et al., 2019.

A comparison of our 30-year long time series of grounding line retreat of Petermann Glacier migration with BedMachine v3 (Morlighem et al. 2017) shows that the glacier's retreat is correlated with the bedrock geometry. Indeed, the recent grounding

line migration ( $\approx$  7 retreat ( $>$  5 km between 1992-2017-2021) coincides with occurred across a section of retrograde bed slope topography that deepens from 470 m to more than 517 m below sea level (Fig 1b, green rectangle). This pattern of retreat is similar to what has been observed for the Thwaites glacier in the Amundsen Sea embayment, West Antarctica or Humboldt Glacier in North Greenland, where the retreat proceeded faster along topographic depressions of the bedrock (Milillo et al., 2019; Carr et al., 2015). In contrast, the eastern and western portions of the grounding zone have migrated slower than the central part, probably because of slightly prograde bedrock at these locations (Fig 1b). The eastern portion of the grounding line has remained stable since 2016, on a high rise in the bedrock grounded 490 m below sea level. However, we note that the bedrock deepens over the next 8 km on a retrograde slope down to 540 m depth (Fig 1c), which may accentuate promote the glacier retreat in the coming years (Schoof et al., 2007).

Glacier thinning due to flow acceleration (Thomas et al. 2004; Flament and Rémy 2017) contributes to grounding line retreat since a thinner glacier reaches flotation sooner. Based the simple geometrical relationship from Rignot et al. (1998), we calculate the grounding retreat rate as a function of thickness change, depth and bed and surface slopes. With a dynamic thinning at about 1 m/yr (Smith et al., 2020) on a -0.11% bed slope and a surface slope of 0.8% measured along the profile C-C', we calculate an expected retreat of about 130 m/yr (Rignot et al. 2016; Hogg et al., 2016), which is below the observed results.

A warming ocean signal however is observed since about 2000 (Fig. 3-5). A warmer ocean will indeed erode the ice shelf faster by enhancing the submarine melt rate at the glacier grounding line (Rignot et al. 2016, An et al., 2021). With an increase in thermal forcing of about 0.3 C (Fig. 5) and neglecting the role of subglacial runoff, the model of Rignot et al., 2016, which expresses submarine melt as a function of thermal forcing, suggests that the melt would increase by 13 m/yr. A thinning of 13 m/yr would correspond to a retreat of 1.6 km/yr with the same surface and bed slopes considered previously, which is within 200 m/yr of the observed grounding line migration in 2018-2021 (Fig 3b).

Although these calculations must be interpreted with caution, as they rely on simple geometric relationships, they would seem to indicate that the recent retreat of the grounding line is mainly caused by rising ocean temperatures rather than dynamic thinning. It might also be possible that the increase in ocean temperatures is a process which would have favoured the large calving events observed in 2010 and 2012.

Finally, the ice flow of Petermann has not yet increased as much as other glaciers in Greenland such as Jakobshavn Isbræ (Motyka et al., 2011) or Zachariae Isstrøm (Mouginot et al., 2015), which are experiencing increased rates of mass losses. However, the 7-km grounding line retreat and the recent fracturation suggest that the Petermann Glacier may be entering a phase of destabilization, which has the potential to change the dynamic of this sector of the Greenland ice sheet in the coming years.

## 5 Conclusion

290 In this study, we report on recent developments concerning the stability of the Petermann Glacier. In 2015, the glacier surface  
flow velocity increased markedly for the first time in the last few decades before stabilizing in 2018. Markedly after 2016,  
large fractures formed and split-up the ice shelf in three sections with high strain rates, and a partially decoupled flowing  
regime. Since 2017, the grounding line has begun to retreat rapidly, while it was considered stable in the previous twenty-five  
years (Hogg et al. 2016).  
295 ~~In this study, we use SAR interferometry to reconstruct the history of Petermann's grounding line~~  
~~over the last 30 years. For the first time and quite recently, a significant and rapid retreat of its grounding line is observed.~~ The  
central section of the grounding line is now more than 7 km upstream of the 1992 position. This recession initiated after 2017  
~~along a retrograde bed and followed a rapid rise in ocean temperature in the Nares Strait. Within the same timeframe, large~~  
~~fractures split up the ice shelf in three sections, with high strain rates, and a partially decoupled flowing regime. In 2016, the~~  
~~glacier surface flow velocity increased markedly for the first time in the last few decades before stabilizing in 2018, while the~~  
300 ~~grounding line continued to retreat up to present and is proceeding along topographic depressions of the bedrock.~~ Large  
sections of the grounding line sitting on down-sloping beds could retreat further in the coming years. We posit that these  
changes are the consequences of the rapid rise in ocean temperature observed in the Nares Strait.

### Data availability

CTD data are available at <https://climatedataguide.ucar.edu/>. Data will be permanently archived through a public data portal  
305 (e.g. [Zenodo](#)) upon acceptance of the paper. Synthetic Aperture Radar data are freely available at  
<https://earth.esa.int/eogateway>.

### Author contribution

R.M and J.M conceived and designed the research. R.M, J.M, E.C processed and analysed data. A.D processed ice velocity  
time series. E.R processed and analysed ocean data. All authors participated in the writing of the manuscript.

### 310 Acknowledgements

We acknowledge support from the French National Research Agency (ANR) grant (ANR-19-CE01-0011-01). We thank the  
European Space Agency for the use of ERS and Sentinel-1 acquisitions, and the Italian Space Agency (ASI) for granting the  
use of CSK products in the framework of the “Ghiacciai” project.

315

## References

- 320 An, L., Rignot, E., Wood, M., Willis, J. K., Mouginot, J., & Khan, S. A. ~~(2021)~~. Ocean melting of the Zachariae Isstrøm and Nioghalvfjærdsfjorden glaciers, northeast Greenland. *Proceedings of the National Academy of Sciences*, *118*(2), *Proc. Nat. Ac. Sci. USA*, *118*, e2015483118. <https://doi.org/10.1073/pnas.2015483118>, 2021.
- 325 Alley, K., Scambos, T., Anderson, R., Rajaram, H., Pope, A., & Haran, T. ~~(2018)~~ Continent-wide estimates of Antarctic strain rates from Landsat 8-derived velocity grids. *Journal of Glaciology*, *J. Glaciol.*, *64*(244), 321-332. <https://doi:10.1017/jog.2018.23>, 2018.
- 330 Choi, Y., Morlighem, M., Rignot, E., & Wood, M. ~~(2021)~~ Ice dynamics will remain a primary driver of Greenland ice sheet mass loss over the next century. *Communications, Comm. Earth & Environment*, *2*(1), *Env.*, 26. <https://doi.org/10.1038/s43247-021-00092-z>, 2021.
- 335 Carr, J., Vieli, A., Stokes, C., Jamieson, S., Palmer, S., Christoffersen, P., . . . Young, D. Basal topographic controls on rapid retreat of Humboldt Glacier, northern Greenland. *J. Glaciol.*, *61*, 137-150, <https://doi:10.3189/2015JoG14J128>, 2015.
- 340 Derkacheva, A., Mouginot, J., Millan, R., Maier, N., & Gillet-Chaulet, F. ~~(2020)~~ Data Reduction Using Statistical and Regression Approaches for Ice Velocity Derived by Landsat-8, Sentinel-1 and Sentinel-2. *Remote Sensing*, *Sens.*, *12*(12), 1935. <https://doi.org/10.3390/rs12121935>, 2020.
- 345 Fürst, J. J., Durand, G., Gillet-Chaulet, F., Tavard, L., Rankl, M., Braun, M., & Gagliardini, O. ~~(2016)~~ The safety band of Antarctic ice shelves. *Nature Climate Change*, *Nat. Clim. Chang.*, *6*(5), 479–482. <https://doi.org/10.1038/nclimate2912>, 2016.
- 340 Fenty, I., J.K. Willis, A. Khazendar, S. Dinardo, R. Forsberg, I. Fukumori, D. Holland, M. Jakobsson, D. Moller, J. Morison, A. Münchow, E. Rignot, M. Schodlok, A.F. Thompson, K. Tinto, M. Rutherford, and N. Trenholm. ~~2016~~ Oceans Melting Greenland: Early results from NASA's ocean-ice mission in Greenland. *Oceanography* 29(4):72–83, <https://doi.org/10.5670/oceanog.2016.100>, 2016.
- 345 Hogg, A. E., Shepherd, A., Gourmelen, N., & Engdahl, M. ~~(2016)~~ Grounding line migration from 1992 to 2011 on Petermann Glacier, North-West Greenland. *Journal of Glaciology*, *J. Glaciol.*, *62*(236), 1104–1114. <https://doi.org/10.1017/jog.2016.83>, 2016.



- 350 Jenkins, A. (2011). Convection-Driven Melting near the Grounding Lines of Ice Shelves and Tidewater Glaciers, *Journal of Physical Oceanography*, 41(12), 2279–2294, doi: <https://doi.org/10.1175/JPO-D-11-03.1>
- Joughin, I., B. Smith, and I. Howat, A complete map of Greenland ice velocity derived from satellite data collected over 20 years, *J. Glaciol.* . 1-11. <https://doi.org/10.1017/jog.2017.73>, 2017.
- Howat, I. 2020. MEASUREs Greenland Ice Velocity: Selected Glacier Site Velocity Maps from Optical Images, Version 4. Boulder, Colorado USA. NASA National Snow and Ice Data Center Distributed Active Archive Center. doi: <https://doi.org/10.5067/RRFY5IW94X5W>. [Date Accessed].
- 360 Milillo, P., Rignot, E., Rizzoli, P., Scheuchl, B., Mouginot, J., Bueso-Bello, J., & Prats-Iraola, P. (2019). Heterogeneous retreat and ice melt of Thwaites Glacier, West Antarctica. *Science Advances*, 5(1). <https://doi.org/10.1126/sciadv.aau3433>, 2019.
- Brancato, V., Rignot, E., Milillo, P., Morlighem, M., Mouginot, J., An, L., ... & Prats-Iraola, P. (2020). Grounding line retreat of Denman Glacier, East Antarctica, measured with COSMO-SkyMed radar interferometry data. *Geophysical Research Letters*, *Geoph. Res. Lett.*, 47(7), e2019GL086291, 2020.
- 365 Mohajerani, Y., Jeong, S., Scheuchl, B., Velicogna, I., Rignot, E., & Milillo, P. (2021). Automatic delineation of glacier grounding lines in differential interferometric synthetic-aperture radar data using deep learning. *Scientific Reports*, *Sci. Rep.*, 11(1), 4992. <https://doi.org/10.1038/s41598-021-84309-3>, 2021.
- 370 Morlighem, M., Williams, C. N., Rignot, E., An, L., Arndt, J. E., Bamber, J. L., et al. (2017). BedMachine v3: Complete Bed Topography and Ocean Bathymetry Mapping of Greenland From Multibeam Echo Sounding Combined With Mass Conservation. *Geophysical Research Letters*, *Geoph. Res. Lett.*, 44(21). <https://doi.org/10.1002/2017GL074954>, 2017.
- 375 Motyka, R. J., Truffer, M., Fahnestock, M., Mortensen, J., Rysgaard, S., and Howat, I. (2011). Submarine melting of the 1985 Jakobshavn Isbræ floating tongue and the triggering of the current retreat, *J. Geophys. Res.*, 116, F01007, doi: [10.1029/2009JF001632](https://doi.org/10.1029/2009JF001632), 2011.
- 380 Mouginot, J., Rignot, E., Bjørk, A. A., van den Broeke, M., Millan, R., Morlighem, M., et al. (2019). Forty-six years of Greenland Ice Sheet mass balance from 1972 to 2018. *Proceedings of the National Academy of Sciences*, *Proc. Natl. Acad. Sci. USA*, 116(19), 9239–9244. <https://doi.org/10.1073/pnas.1904242116>, 2019.
- Mouginot, J., Rignot, E., Scheuchl, B., Fenty, I., Khazendar, A., Morlighem, M., Buzza, A., Paden, J., Fast retreat of Zachariaë Isstrøm, Northeast Greenland. *Science*, 6266, 1357-1361. doi:10.1126/science.aac7111, 2015.

- 385 Millan, R., Mouginot, J., Rabatel, A., ~~et al.~~, Morlighem, M. Ice velocity and thickness of the world's glaciers. *Nat. Geosci.* **15**, 124–129. ~~(<https://doi.org/10.1038/s41561-021-00885-z>, 2022)~~. ~~<https://doi.org/10.1038/s41561-021-00885-z>~~.
- 390 Millan R, Mouginot J, Rabatel A, Jeong S, Cusicanqui D, Derkacheva A, Chekki M. Mapping Surface Flow Velocity of Glaciers at Regional Scale Using a Multiple Sensors Approach. *Remote Sensing*. 2019; 11(21):2498. ~~<https://doi.org/10.3390/rs11212498>~~ ~~<https://doi.org/10.3390/rs11212498>~~, 2019.
- Münchow, A., Padman, L., & Fricker, H. ~~(2014)~~. Interannual changes of the floating ice shelf of Petermann Gletscher, North Greenland, from 2000 to 2012. *Journal of Glaciology*, *J. Glaciol.*, **60**(221), 489-499. doi:10.3189/2014JoG13J135, 2014.
- 395 Nye, JF ~~(1959)~~. A method of determining the strain-rate tensor at the surface of a glacier. *J. Glaciol.*, Cambridge Austerdalsbre Expedition (*Paper No. 6*), 3(25), 409–419, ~~<https://doi.org/10.3189/S0022143000017093>~~ 1959.
- Pattyn, F., & Morlighem, M. ~~(2020)~~. The uncertain future of the Antarctic Ice Sheet. *Science*, **367**(6484), 1331–1335. ~~<https://doi.org/10.1126/science.aaz5487>~~, 2020.
- 400 Reager, J. T., Gardner, A. S., Famiglietti, J. S., Wiese, D. N., & Eicker, A. ~~(n.d.)~~, Lo, M. H. A decade of sea level rise slowed by climate-driven hydrology, ~~6~~ *Science*, **6**, ~~<https://doi.org/10.1126/science.aad8386>~~, 2016.
- 405 Reese, R., Albrecht, T., Mengel, M., Asay-Davis, X., & Winkelmann, R. ~~(2018)~~. Antarctic sub-shelf melt rates via PICO. *The Cryosphere*, **12**(6), 1969–1985. ~~<https://doi.org/10.5194/tc-12-1969-2018>~~, 2018.
- 410 Rignot, E., Mouginot, J., Morlighem, M., Seroussi, H., & Scheuchl, B. ~~(2014)~~. Widespread, rapid grounding line retreat of Pine Island, Thwaites, Smith, and Kohler glaciers, West Antarctica, from 1992 to 2011. *Geophysical Research Letters*, *Geophys. Res. Lett.*, **41**(10), 3502–3509. ~~<https://doi.org/10.1002/2014GL060140>~~, 2014.
- Rignot, E., Xu, Y., Menemenlis, D., Mouginot, J., Scheuchl, B., Li, X., et al. ~~(2016)~~. Modeling of ocean-induced ice melt rates of five west Greenland glaciers over the past two decades. *Geophysical Research Letters*, *Geophys. Res. Lett.*, **43**(12), 6374–6382. ~~<https://doi.org/10.1002/2016GL068784>~~, 2016.

415 Rignot, Eric. ~~(2006)~~. Changes in ice dynamics and mass balance of the Antarctic ice sheet. *Philosophical Transactions of the Royal Society A: Mathematical, Physical and Engineering Sciences* *Philos. Trans. R. Soc. B*, 364(1844), 1637–1655. <https://doi.org/10.1098/rsta.2006.1793>, 2006.

Rückamp, M., Goelzer, H., & Humbert, A. (2020). Sensitivity of Greenland ice sheet projections to spatial resolution in higher-order simulations: the Alfred Wegener Institute (AWI) contribution to ISMIP6 Greenland using the Ice sheet and Sea level System Model (ISSM). *The Cryosphere*, 14(10), 3309–3327. <https://doi.org/10.5194/te-14-3309-2020>

420 Rückamp, M., Neckel, N., Berger, S., Humbert, A., & Helm, V.. Calving induced speedup of petermann glacier. *J. Geophys. Res.: Earth Surf.*, 124, 216–228. <https://doi.org/10.1029/2018JF004775>, 2019.

425

Schoof, C. ~~(2007)~~. Ice sheet grounding line dynamics: Steady states, stability, and hysteresis. *Journal of Geophysical Research* *J. Geophys. Res.*, 112(F3), F03S28. <https://doi.org/10.1029/2006JF000664> <https://doi.org/10.1029/2006JF000664>, 2007.

430 Thomas, R. H. ~~(1979)~~. The Dynamics of Marine Ice Sheets. *Journal of Glaciology* *J. Glaciol.*, 24(90), 167–177. <https://doi.org/10.3189/S0022143000014726>, 1979.

Smith Ben, Fricker Helen A., Gardner Alex S., Medley Brooke, Nilsson Johan, Paolo Fernando S., et al. ~~(2020)~~. Pervasive ice sheet mass loss reflects competing ocean and atmosphere processes. *Science*, 368(6496), 1239–1242.

435 <https://doi.org/10.1126/science.aaz5845>, 2020.

Washam, P., Münchow, A., & Nicholls, K. W. ~~(2018)~~. A Decade of Ocean Changes Impacting the Ice Shelf of Petermann Gletscher, Greenland, *Journal of Physical Oceanography* *J. Phys. Oceanogr.*, 48(10), 2477–2493. Retrieved Nov 26, 2021, from <https://journals.ametsoc.org/view/journals/phoc/48/10/jpo-d-17-0181.1.xml>, <https://doi.org/10.1175/JPO-D-17-0181.1>, 2018

440

Wilson, N., Straneo, F., & Heimbach, P. (2017). Satellite-derived submarine melt rates and mass balance (2011–2015) for Greenland’s largest remaining ice tongues. *The Cryosphere*, 11(6), 2773–2782. <https://doi.org/10.5194/te-11-2773-2017>, 2017

445

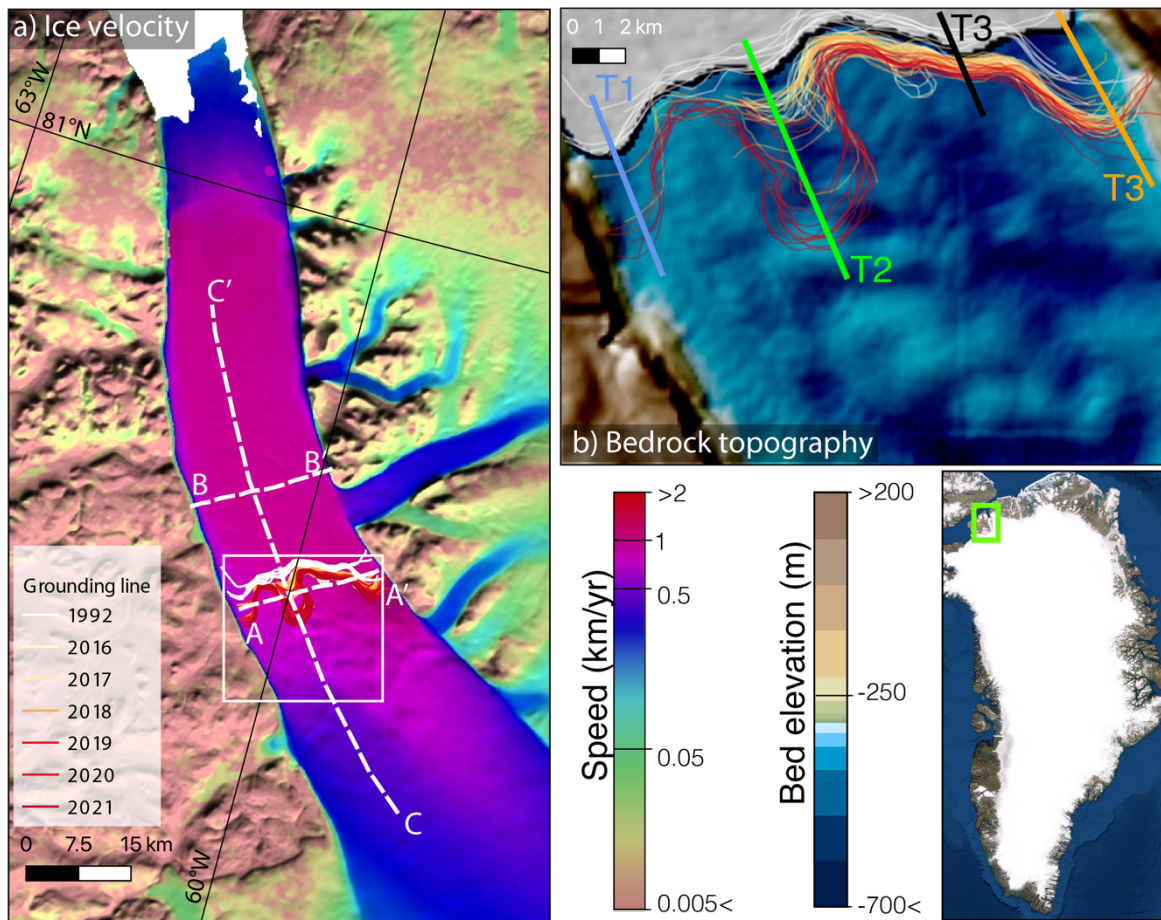

**Figure 1.** (a) Satellite derived surface flow velocity of Petermann Glacier's ice shelf colour coded on a logarithmic scale from brown to red. Dashed white line indicates the location of velocity profiles (c.f. Fig 3). Inset map shows the location of the Petermann over the ice velocity map of the Greenland ice sheet (Mouginot et al., 2019). (b) Bedrock geometry from BedMachine v3 on a blue colour scale (Morlighem et al., 2017). Lines T1, T2, T3 and T4 are used in Fig. 3a to show the evolution of the grounding line position over time. (c) Evolution of the grounding line position overlaid on a three-dimensional



view of the bedrock elevation. Solid colour lines in (ba) and (eb) indicates the position of the DInSAR grounding lines between 1992 and present, and are colour coded on a scale from white (1992) to red (2021).

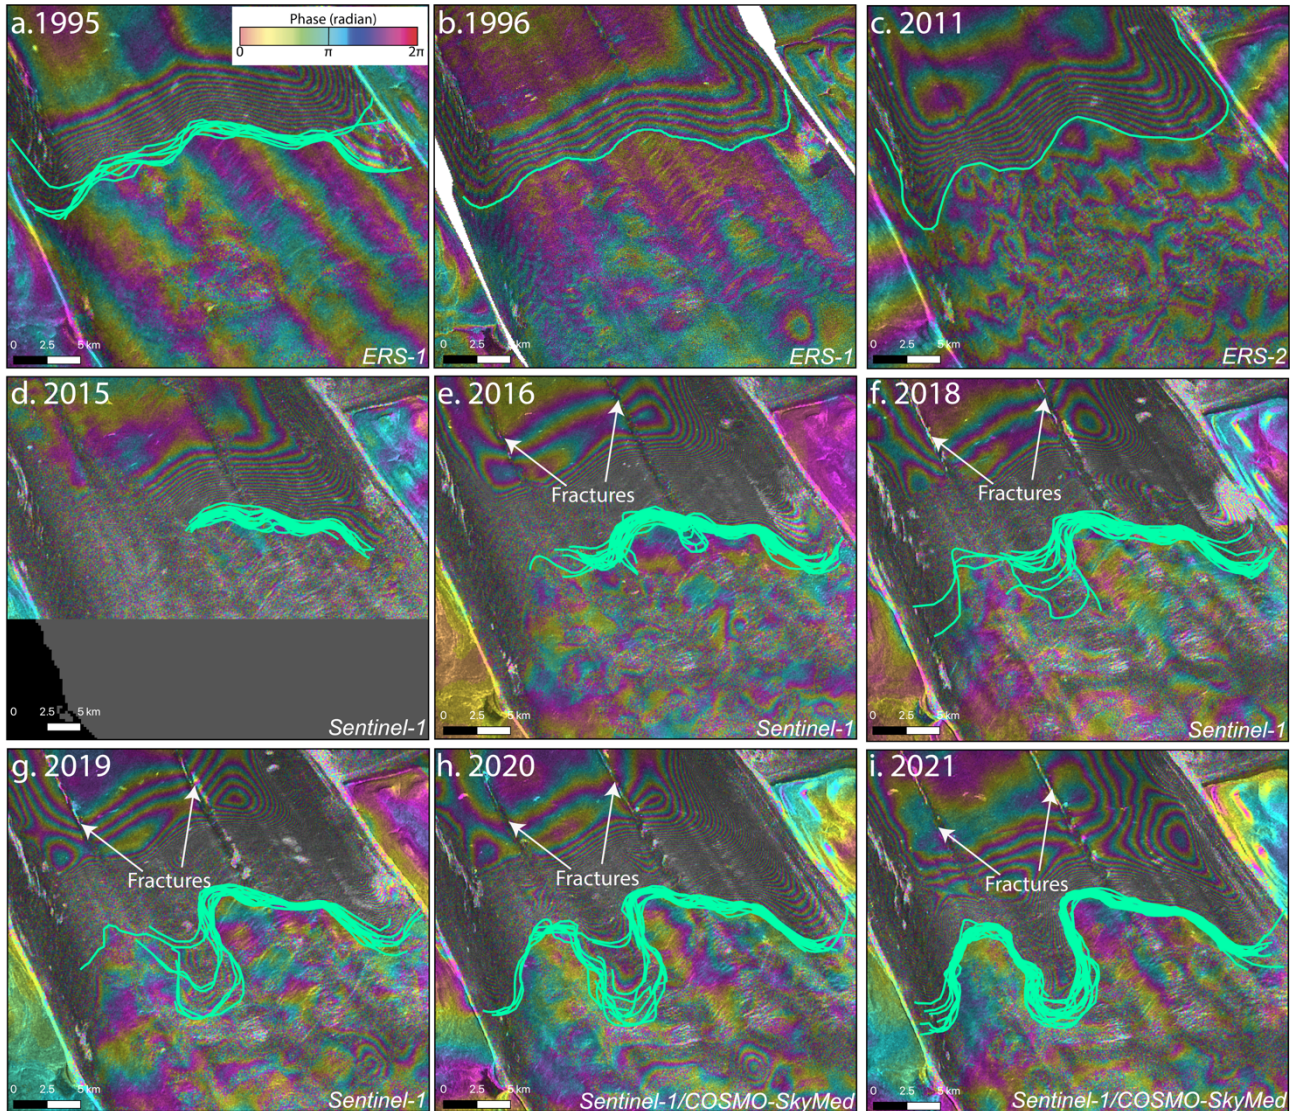

465

**Figure 2.** Selection of double difference SAR interferograms of Petermann Glacier, Greenland, collected between 1992 and 2021. Solid light green lines indicate the digitized grounding line positions for a given year. White arrows are showing the location of across shelf fractures.

470

475

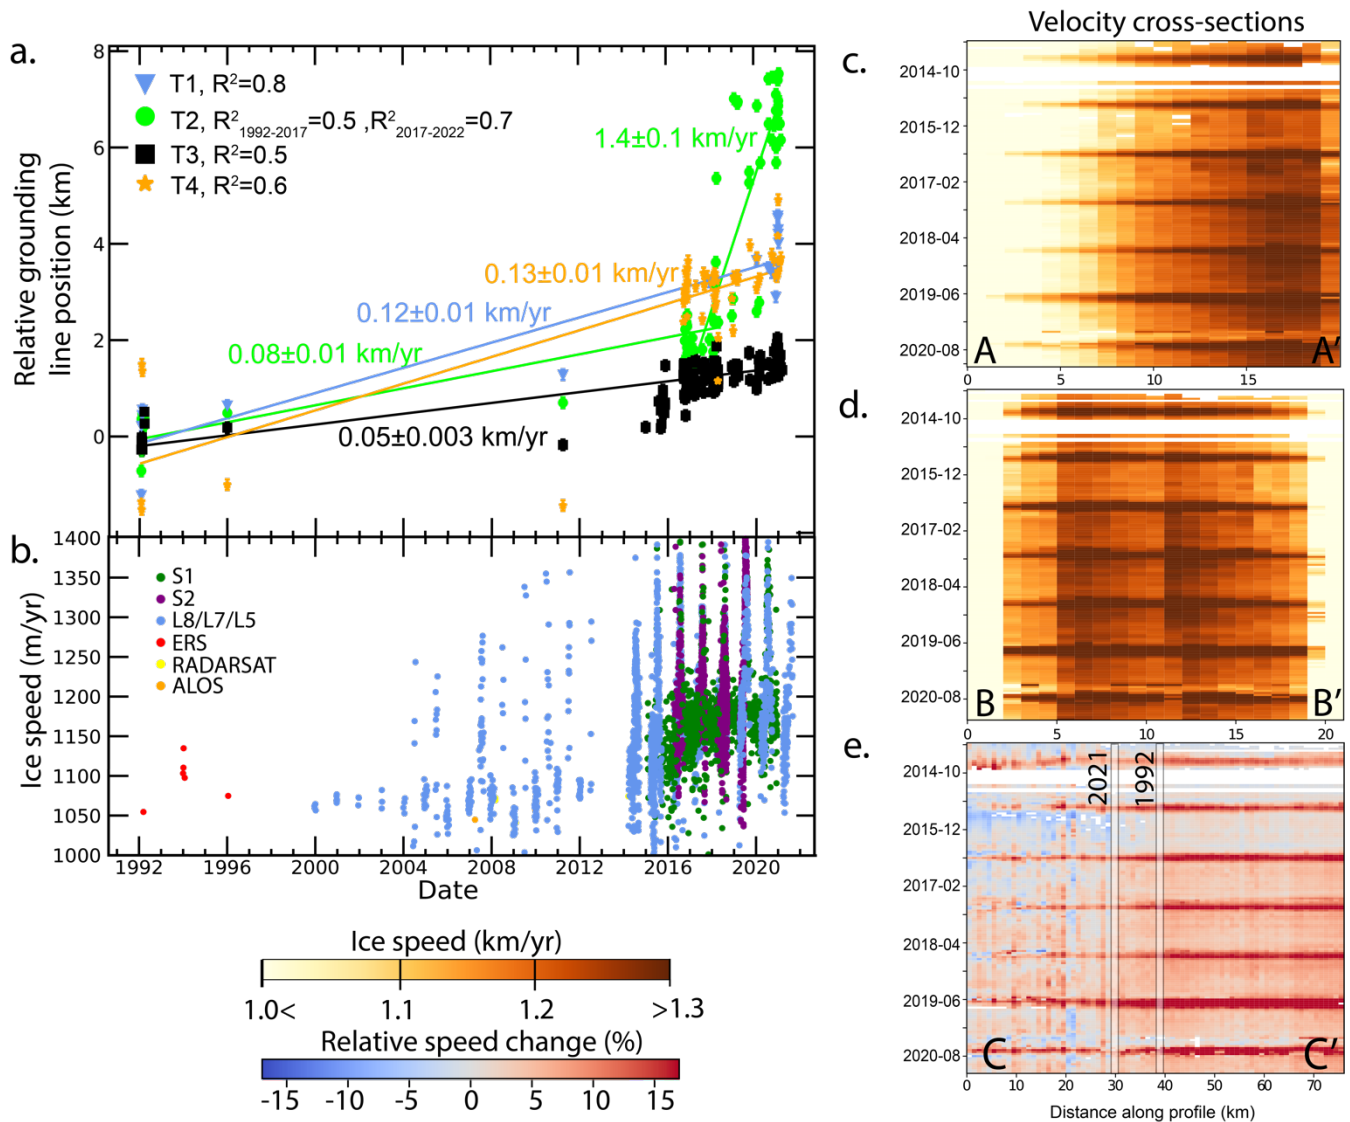

**Figure 3.** Relative grounding line position and change in ice speed of Petermann glacier. a) Relative grounding line position with respect to the location in February 1992 for four locations across Peterman's width (see profiles T1 to T4 in Fig. 1b). Slopes of each linear fit (indicating the rate of grounding line retreat) are shown in the same colour as each line- along with standard errors on the slope.  $R^2$  values are given for all linear fit and are shown in the legend. b) Long-term change in ice flow velocity at the grounding line, c) and d) Hovmöller diagram of velocity at the cross sections A-A' and B-B' (see Figure 1a). e) Percentage change in speed relative to the 2014 winter average along profile C-C'. The vertical lines indicates the position of the 1992 and 2021 grounding lines on the profile C-C'.



490

495

500

505

510

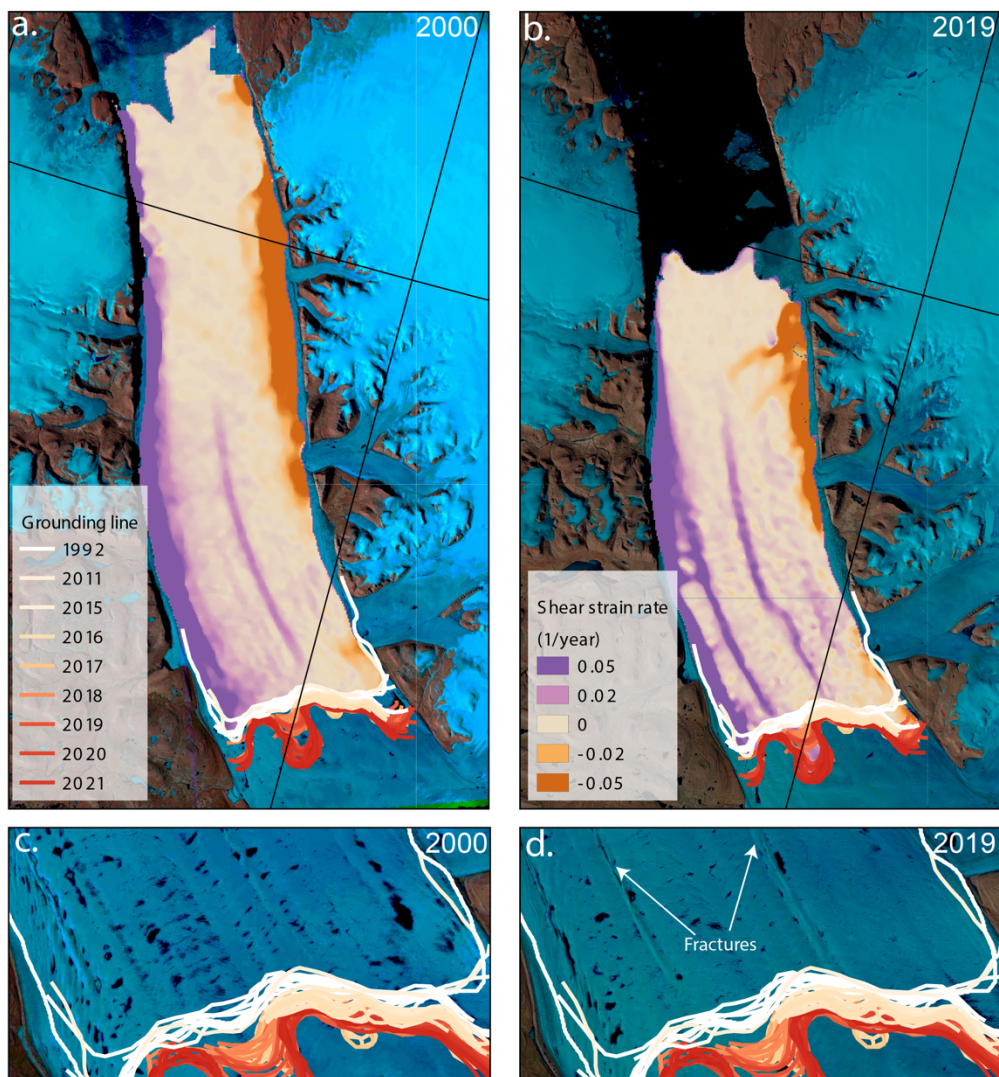

515

**Figure 4.** Shear strain rates of Petermann Glacier in 2000 (a) and 2019 (b), overlaid on Landsat images from the same year. Strain rates are colour coded from orange to violet to green. (c) and (d) display the surface expression of the shear strain maps from Landsat-7 and Landsat-8 images taken in 2000 and 2019, respectively. Solid colour lines show show the grounding line position between 1992 and present 2021, colour coded on a scale from white (1992) to red (2021).

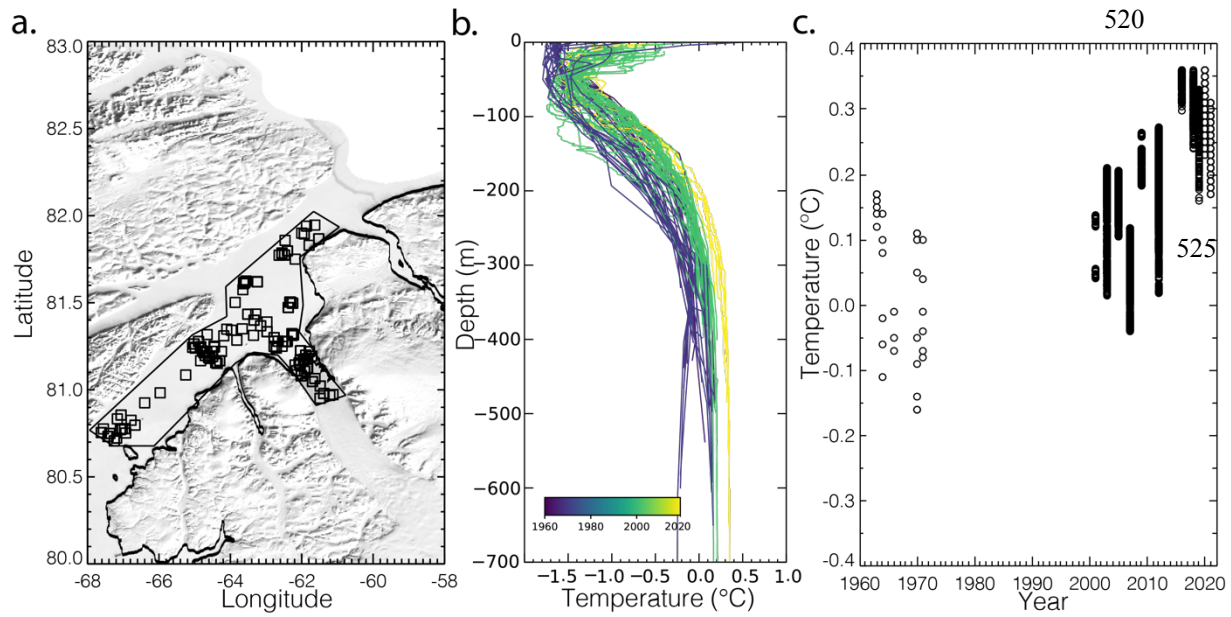

**Figure 5.** Conductivity, Temperature, Depth (CTD) measurements near Petermann Glacier, Greenland with a) CTD location from 1963-2021 ~~colour coded by years as in b)~~ with coastline in black and region of extraction in thin black; b) potential temperature from CTD casts color coded by year from 1963-2021; and c) change in temperature averaged between 350 and 450 m depth from 1963 to 2021 ~~colour coded by years~~.
